# Supplementary material for: Synthesis and structural characterization of tricarbomethoxymethanate complexes of copper(II) and barium(II) and evaluation of their suitability for MOCVD applications
Source: Royal Society of Chemistry journal article supplement (doi:10.1039/b008147g), 2001-01-01
Supplement: b008147g.doc [file b008147g.doc]

Supplementary Material for

**Synthesis and structural characterization of tricarbomethoxymethanate complexes of copper(II) and barium(II) and evaluation of the suitability of these complexes for MOCVD applications**

**David V. Baxter, Kenneth G. Caulton,* Wen-Chung Chiang, Malcolm H. Chisholm,* Vincent F. DiStasi, Sylvain G. Dutremez, James D. Martin and William E. Streib**

*Physics Department, Department of Chemistry and Molecular Structure Center, Indiana University, Bloomington, IN 47405-7102, USA. Fax: (+1) 812-855-8300; e-mail: caulton@indiana.edu*

___________________________

Complete Crystallographic Data and Experimental Details for

Cu[C(CO2Me)3]2[THF]2, Cu[C(CO2Me)3]2, and Ba2[C(CO2Me)3]4[HMPA]4

Fractional Coordinates and Isotropic Thermal Parameters

Anisotropic Thermal Parameters

Full Tables of Bond Lengths and Angles

**Table S1.** Crystallographic Data and Experimental Details

|  | | | |
| --- | --- | --- | --- |
|  | Cu[C(CO2Me)3]2[THF]2 | Cu[C(CO2Me)3]2 | Ba2[C(CO2Me)3]4[HMPA]4 |
|  | | | |
|  |  |  |  |
| Formula | C22H34CuO14 | C14H18CuO12 | C52H108N12O28Ba2P4 |
|  |  |  |  |
| Color | pale green | emerald green | colorless |
|  |  |  |  |
| Crystal Dimensions (mm) | 0.12 x 0.32 x 0.40 | 0.25 x 0.25 x 0.30 | 0.25 x 0.25 x 0.25 |
|  |  |  |  |
| Space Group | *P*21/*n* (no. 14) | *P*21/*n* (no. 14) | *P*1 (no. 2) |
|  |  |  |  |
| Cell Dimensions | (at -170°C;  62 reflns.) | (at -122°C;  56 reflns.) | (at -150°C;  69 reflns.) |
|  |  |  |  |
| a = | 7.518(1) Å | 6.6222(8) Å | 16.327(2) Å |
| b = | 9.620(1) Å | 10.5537(13) Å | 24.327(3) Å |
| c = | 18.043(3) Å | 13.2204(17) Å | 10.680(1) Å |
|  = |  |  | 100.26(1)° |
|  = | 93.72(1)° | 102.718(7)° | 99.66(1)° |
|  = |  |  | 72.55(1)° |
|  |  |  |  |
| Z (Molecules/cell) | 2 | 2 | 2 |
|  |  |  |  |
| Volume (Å3) | 1302.23 | 901.29 | 3952.40 |
|  |  |  |  |
| Calculated Density (g cm-3) | 1.495 | 1.628 | 1.469 |
|  |  |  |  |
| Wavelength (Å) | 0.710 69 | 0.710 69 | 0.710 69 |
|  |  |  |  |
| Molecular Weight | 586.05 | 441.84 | 1748.06 |
|  |  |  |  |
| Linear Absorp. Coeff. (cm-1) | 9.044 | 12.721 | 11.457 |
|  |  |  |  |
| Number of Reflns. Collected | 4734 | 4457 | 11117 |
|  |  |  |  |
| Number of Unique Intensities | 3000 | 2081 | 10389 |
|  |  |  |  |
| Rint | 0.022 | 0.019 | 0.027 |
|  |  |  |  |
| Number with F > 0.0 | 2793 | 1965 | 9636 |
|  |  |  |  |
| Number with F > n(F) | 2505 (n = 3) | 1803 (n = 3) | 8654 (n = 2.33) |
|  |  |  |  |
| Final Residuals  R(F)  Rw(F) | 0.0365  0.0385 | 0.0272  0.0283 | 0.0436  0.0478 |
|  |  |  |  |
| Goodness of Fit for Last Cycle | 0.980 | 1.092 | 1.211 |
|  |  |  |  |
| Maximum / for Last Cycle | 0.32 | 0.30 | 0.024 |
|  |  |  |  |

**Table S2.** Fractional Coordinatesa and Isotropic Thermal Parametersb for Cu[C(CO2Me)3]2[THF]2

|  | | | | |
| --- | --- | --- | --- | --- |
| Atom | 104 x | 104 y | 104 z | 10 Biso, Å2 |
|  | | | | |
|  |  |  |  |  |
| Cu(1) | 5000* | 5000* | 5000* | 10 |
|  |  |  |  |  |
| O(2) | 2871(2) | 5419(2) | 5513(1) | 11 |
|  |  |  |  |  |
| C(3) | 2678(3) | 6434(2) | 5935(1) | 11 |
|  |  |  |  |  |
| C(4) | 3852(3) | 7561(2) | 6075(1) | 12 |
|  |  |  |  |  |
| C(5) | 5461(3) | 7651(2) | 5721(1) | 11 |
|  |  |  |  |  |
| O(6) | 6090(2) | 6783(2) | 5288(1) | 11 |
|  |  |  |  |  |
| O(7) | 1186(2) | 6517(2) | 6306(1) | 13 |
|  |  |  |  |  |
| C(8) | -83(3) | 5391(3) | 6194(1) | 15 |
|  |  |  |  |  |
| O(9) | 6413(2) | 8811(2) | 5894(1) | 13 |
|  |  |  |  |  |
| C(10) | 8074(3) | 8979(3) | 5548(1) | 16 |
|  |  |  |  |  |
| C(11) | 3374(3) | 8649(2) | 6620(1) | 11 |
|  |  |  |  |  |
| O(12) | 3451(3) | 8514(2) | 7281(1) | 19 |
|  |  |  |  |  |
| O(13) | 2816(2) | 9829(2) | 6277(1) | 16 |
|  |  |  |  |  |
| C(14) | 2327(4) | 10938(3) | 6770(2) | 19 |
|  |  |  |  |  |
| O(15) | 6297(2) | 3895(2) | 6102(1) | 14 |
|  |  |  |  |  |
| C(16) | 5494(4) | 4135(3) | 6793(1) | 16 |
|  |  |  |  |  |
| C(17) | 6518(4) | 3203(3) | 7357(1) | 19 |
|  |  |  |  |  |
| C(18) | 7252(4) | 2038(3) | 6885(1) | 21 |
|  |  |  |  |  |
| C(19) | 6700(4) | 2440(3) | 6086(1) | 20 |
|  |  |  |  |  |

a Parameters marked by an asterisk (*) were not varied. b Isotropic values for those atoms refined anisotropically are calculated using the formula given by Hamilton: Hamilton, W. C. *Acta Crystallogr.* **1959**, *12*, 609.

**Table S3.** Anisotropic Thermal Parameters for Cu[C(CO2Me)3]2[THF]2

|  | | | | | | |
| --- | --- | --- | --- | --- | --- | --- |
| Atom | U11 | U22 | U33 | U12 | U13 | U23 |
|  | | | | | | |
|  |  |  |  |  |  |  |
| Cu(1) | 12.8(2) | 9.9(2) | 14.1(2) | 0.3(2) | 2.5(1) | -3.1(2) |
|  |  |  |  |  |  |  |
| O(2) | 14(1) | 12(1) | 17(1) | 0(1) | 3(1) | -4(1) |
|  |  |  |  |  |  |  |
| C(3) | 13(1) | 14(1) | 13(1) | 3(1) | 0(1) | 1(1) |
|  |  |  |  |  |  |  |
| C(4) | 17(1) | 11(1) | 16(1) | 1(1) | 3(1) | -2(1) |
|  |  |  |  |  |  |  |
| C(5) | 17(1) | 11(1) | 14(1) | -1(1) | -1(1) | 3(1) |
|  |  |  |  |  |  |  |
| O(6) | 15(1) | 12(1) | 17(1) | -1(1) | 3(1) | -4(1) |
|  |  |  |  |  |  |  |
| O(7) | 16(1) | 16(1) | 20(1) | -2(1) | 5(1) | -5(1) |
|  |  |  |  |  |  |  |
| C(8) | 17(1) | 19(1) | 20(1) | -4(1) | 3(1) | -2(1) |
|  |  |  |  |  |  |  |
| O(9) | 17(1) | 13(1) | 20(1) | -4(1) | 4(1) | -4(1) |
|  |  |  |  |  |  |  |
| C(10) | 17(1) | 17(1) | 27(1) | -6(1) | 4(1) | -3(1) |
|  |  |  |  |  |  |  |
| C(11) | 13(1) | 14(1) | 16(1) | -2(1) | 2(1) | -1(1) |
|  |  |  |  |  |  |  |
| O(12) | 39(1) | 20(1) | 15(1) | 4(1) | 5(1) | -2(1) |
|  |  |  |  |  |  |  |
| O(13) | 28(1) | 14(1) | 18(1) | 5(1) | 4(1) | -2(1) |
|  |  |  |  |  |  |  |
| C(14) | 30(1) | 16(1) | 28(1) | 4(1) | 9(1) | -5(1) |
|  |  |  |  |  |  |  |
| O(15) | 23(1) | 14(1) | 16(1) | 1(1) | 3(1) | 2(1) |
|  |  |  |  |  |  |  |
| C(16) | 23(1) | 20(1) | 16(1) | 1(1) | 4(1) | 0(1) |
|  |  |  |  |  |  |  |
| C(17) | 32(1) | 22(1) | 18(1) | -1(1) | -1(1) | 3(1) |
|  |  |  |  |  |  |  |
| C(18) | 30(1) | 25(1) | 25(1) | 9(1) | 1(1) | 4(1) |
|  |  |  |  |  |  |  |
| C(19) | 39(2) | 16(1) | 21(1) | 8(1) | 5(1) | 1(1) |
|  |  |  |  |  |  |  |

Form of the anisotropic thermal parameter: exp[-22(h2a*2U11 + ... + hka*b*U12 + ... )] where a*, b*, and c* are reciprocal lattice constants. All values are  103.

**Table S4.** Bond Lengths and Angles for Cu[C(CO2Me)3]2[THF]2a

|  | | | | | | | | |
| --- | --- | --- | --- | --- | --- | --- | --- | --- |
| Bond Lengths (Å) | | | | | | | | |
|  | | | | | | | | |
| Cu(1)-O(2) | 1.9423(15) | | O(9)-C(5) | | 1.3511(27) | C(3)-C(4) | | 1.411(3) |
|  |  | |  | |  |  | |  |
| Cu(1)-O(6) | 1.9569(15) | | O(9)-C(10) | | 1.4414(28) | C(4)-C(5) | | 1.407(3) |
|  |  | |  | |  |  | |  |
| Cu(1)-O(15) | 2.4048(16) | | O(12)-C(11) | | 1.1976(28) | C(4)-C(11) | | 1.495(3) |
|  |  | |  | |  |  | |  |
| O(2)-C(3) | 1.2529(27) | | O(13)-C(11) | | 1.3463(28) | C(16)-C(17) | | 1.527(4) |
|  |  | |  | |  |  | |  |
| O(6)-C(5) | 1.2570(27) | | O(13)-C(14) | | 1.452(3) | C(17)-C(18) | | 1.532(4) |
|  |  | |  | |  |  | |  |
| O(7)-C(3) | 1.3455(26) | | O(15)-C(16) | | 1.438(3) | C(18)-C(19) | | 1.524(4) |
|  |  | |  | |  |  | |  |
| O(7)-C(8) | 1.4490(28) | | O(15)-C(19) | | 1.432(3) |  | |  |
|  | | | | | | | | |
| Angles (deg) | | | | | | | | |
|  | | | | | | | | |
| O(2)-Cu(1)-O(6) | | 92.06(6) | | O(2)-C(3)-C(4) | | | 127.77(20) | |
|  | |  | |  | | |  | |
| O(2)-Cu(1)-O(6)' | | 87.94(6) | | O(7)-C(3)-C(4) | | | 113.41(19) | |
|  | |  | |  | | |  | |
| O(2)-Cu(1)-O(15) | | 90.01(6) | | C(3)-C(4)-C(5) | | | 120.81(20) | |
|  | |  | |  | | |  | |
| O(2)-Cu(1)-O(15)' | | 89.99(6) | | C(3)-C(4)-C(11) | | | 118.80(19) | |
|  | |  | |  | | |  | |
| O(6)-Cu(1)-O(15) | | 91.60(6) | | C(5)-C(4)-C(11) | | | 120.38(20) | |
|  | |  | |  | | |  | |
| O(6)-Cu(1)-O(15)' | | 88.40(6) | | O(6)-C(5)-O(9) | | | 118.50(19) | |
|  | |  | |  | | |  | |
| Cu(1)-O(2)-C(3) | | 125.65(15) | | O(6)-C(5)-C(4) | | | 127.68(21) | |
|  | |  | |  | | |  | |
| Cu(1)-O(6)-C(5) | | 125.38(14) | | O(9)-C(5)-C(4) | | | 113.81(19) | |
|  | |  | |  | | |  | |
| C(3)-O(7)-C(8) | | 116.68(18) | | O(12)-C(11)-O(13) | | | 122.91(21) | |
|  | |  | |  | | |  | |
| C(5)-O(9)-C(10) | | 116.96(18) | | O(12)-C(11)-C(4) | | | 125.45(21) | |
|  | |  | |  | | |  | |
| C(11)-O(13)-C(14) | | 114.93(19) | | O(13)-C(11)-C(4) | | | 111.64(19) | |
|  | |  | |  | | |  | |
| Cu(1)-O(15)-C(16) | | 118.37(14) | | O(15)-C(16)-C(17) | | | 105.21(20) | |
|  | |  | |  | | |  | |
| Cu(1)-O(15)-C(19) | | 119.38(14) | | C(16)-C(17)-C(18) | | | 104.03(20) | |
|  | |  | |  | | |  | |
| C(16)-O(15)-C(19) | | 105.97(18) | | C(17)-C(18)-C(19) | | | 104.76(21) | |
|  | |  | |  | | |  | |
| O(2)-C(3)-O(7) | | 118.81(20) | | O(15)-C(19)-C(18) | | | 105.92(21) | |
|  | |  | |  | | |  | |

a Numbers in parentheses are estimated standard deviations in the least significant digits.

**Table S5.** Fractional Coordinatesa and Isotropic Thermal Parametersb for Cu[C(CO2Me)3]2

|  | | | | |
| --- | --- | --- | --- | --- |
| Atom | 104 x | 104 y | 104 z | 10 Biso, Å2 |
|  | | | | |
|  |  |  |  |  |
| Cu(1) | 5000* | 5000* | 5000* | 18 |
|  |  |  |  |  |
| O(2) | 3346(2) | 6312(1) | 4234(1) | 20 |
|  |  |  |  |  |
| C(3) | 1810(3) | 6847(2) | 4448(1) | 17 |
|  |  |  |  |  |
| C(4) | 941(3) | 6623(2) | 5324(1) | 17 |
|  |  |  |  |  |
| C(5) | 1893(3) | 5729(2) | 6079(1) | 18 |
|  |  |  |  |  |
| O(6) | 3500(2) | 5099(1) | 6090(1) | 19 |
|  |  |  |  |  |
| O(7) | 827(2) | 7714(1) | 3773(1) | 23 |
|  |  |  |  |  |
| C(8) | 1708(4) | 7933(2) | 2870(2) | 28 |
|  |  |  |  |  |
| O(9) | 996(2) | 5599(1) | 6892(1) | 23 |
|  |  |  |  |  |
| C(10) | 2004(4) | 4746(2) | 7702(2) | 28 |
|  |  |  |  |  |
| C(11) | -937(3) | 7288(2) | 5469(1) | 18 |
|  |  |  |  |  |
| O(12) | -2437(2) | 6804(1) | 5703(1) | 22 |
|  |  |  |  |  |
| O(13) | -809(2) | 8549(1) | 5338(1) | 23 |
|  |  |  |  |  |
| C(14) | -2630(4) | 9261(2) | 5401(2) | 30 |
|  |  |  |  |  |

a Parameters marked by an asterisk (*) were not varied. b Isotropic values for those atoms refined anisotropically are calculated using the formula given by Hamilton: Hamilton, W. C. *Acta Crystallogr.* **1959**, *12*, 609.

**Table S6.** Anisotropic Thermal Parameters for Cu[C(CO2Me)3]2

|  | | | | | | |
| --- | --- | --- | --- | --- | --- | --- |
| Atom | U11 | U22 | U33 | U12 | U13 | U23 |
|  | | | | | | |
|  |  |  |  |  |  |  |
| Cu(1) | 22.3(2) | 30.0(2) | 19.4(2) | 8.2(1) | 10.9(1) | 4.4(1) |
|  |  |  |  |  |  |  |
| O(2) | 23(1) | 32(1) | 23(1) | 7(1) | 11.7(5) | 5(1) |
|  |  |  |  |  |  |  |
| C(3) | 21(1) | 26(1) | 20(1) | 2(1) | 6(1) | -1(1) |
|  |  |  |  |  |  |  |
| C(4) | 20(1) | 27(1) | 21(1) | 2(1) | 8(1) | -2(1) |
|  |  |  |  |  |  |  |
| C(5) | 20(1) | 29(1) | 19(1) | -2(1) | 8(1) | -3(1) |
|  |  |  |  |  |  |  |
| O(6) | 23(1) | 32(1) | 19(1) | 5(1) | 8.8(5) | 3(1) |
|  |  |  |  |  |  |  |
| O(7) | 32(1) | 39(1) | 21(1) | 14(1) | 14(1) | 7(1) |
|  |  |  |  |  |  |  |
| C(8) | 43(1) | 45(1) | 25(1) | 14(1) | 19(1) | 11(1) |
|  |  |  |  |  |  |  |
| O(9) | 27(1) | 45(1) | 20(1) | 6(1) | 12(1) | 6(1) |
|  |  |  |  |  |  |  |
| C(10) | 31(1) | 52(2) | 25(1) | 2(1) | 11(1) | 11(1) |
|  |  |  |  |  |  |  |
| C(11) | 23(1) | 31(1) | 16(1) | 2(1) | 5(1) | -2(1) |
|  |  |  |  |  |  |  |
| O(12) | 23(1) | 35(1) | 28(1) | 0(1) | 12(1) | -1(1) |
|  |  |  |  |  |  |  |
| O(13) | 29(1) | 29(1) | 35(1) | 6(1) | 17(1) | 0(1) |
|  |  |  |  |  |  |  |
| C(14) | 39(1) | 36(1) | 45(1) | 13(1) | 24(1) | 6(1) |
|  |  |  |  |  |  |  |

Form of the anisotropic thermal parameter: exp[-22(h2a*2U11 + ... + hka*b*U12 + ... )] where a*, b*, and c* are reciprocal lattice constants. All values are  103.

**Table S7.** Bond Lengths and Angles for Cu[C(CO2Me)3]2a

|  | | | | | | | | |
| --- | --- | --- | --- | --- | --- | --- | --- | --- |
| Bond Lengths (Å) | | | | | | | | |
|  | | | | | | | | |
| Cu(1)-O(2) | 1.9111(13) | | O(7)-C(8) | | 1.4575(22) | O(13)-C(14) | | 1.4382(24) |
|  |  | |  | |  |  | |  |
| Cu(1)-O(6) | 1.9244(12) | | O(9)-C(5) | | 1.3441(20) | C(3)-C(4) | | 1.4224(23) |
|  |  | |  | |  |  | |  |
| O(2)-C(3) | 1.2489(21) | | O(9)-C(10) | | 1.4447(25) | C(4)-C(5) | | 1.4169(25) |
|  |  | |  | |  |  | |  |
| O(6)-C(5) | 1.2529(21) | | O(12)-C(11) | | 1.2160(22) | C(4)-C(11) | | 1.4768(24) |
|  |  | |  | |  |  | |  |
| O(7)-C(3) | 1.3422(22) | | O(13)-C(11) | | 1.3467(23) |  | |  |
|  | | | | | | | | |
| Angles (deg) | | | | | | | | |
|  | | | | | | | | |
| O(2)-Cu(1)-O(6) | | 91.56(5) | | C(3)-C(4)-C(5) | | | 119.20(15) | |
|  | |  | |  | | |  | |
| O(2)-Cu(1)-O(6)' | | 88.44(5) | | C(3)-C(4)-C(11) | | | 122.03(16) | |
|  | |  | |  | | |  | |
| Cu(1)-O(2)-C(3) | | 127.49(12) | | C(5)-C(4)-C(11) | | | 118.77(15) | |
|  | |  | |  | | |  | |
| Cu(1)-O(6)-C(5) | | 126.72(12) | | O(6)-C(5)-O(9) | | | 117.43(16) | |
|  | |  | |  | | |  | |
| C(3)-O(7)-C(8) | | 115.43(15) | | O(6)-C(5)-C(4) | | | 127.33(16) | |
|  | |  | |  | | |  | |
| C(5)-O(9)-C(10) | | 116.28(15) | | O(9)-C(5)-C(4) | | | 115.17(15) | |
|  | |  | |  | | |  | |
| C(11)-O(13)-C(14) | | 115.57(16) | | O(12)-C(11)-O(13) | | | 121.75(17) | |
|  | |  | |  | | |  | |
| O(2)-C(3)-O(7) | | 117.28(15) | | O(12)-C(11)-C(4) | | | 126.26(18) | |
|  | |  | |  | | |  | |
| O(2)-C(3)-C(4) | | 127.18(17) | | O(13)-C(11)-C(4) | | | 111.97(15) | |
|  | |  | |  | | |  | |
| O(7)-C(3)-C(4) | | 115.53(15) | |  | | |  | |
|  | |  | |  | | |  | |

a Numbers in parentheses are estimated standard deviations in the least significant digits.

**Table S8.** Fractional Coordinates and Isotropic Thermal Parametersa for Ba2[C(CO2Me)3]4[HMPA]4

|  | | | | |
| --- | --- | --- | --- | --- |
| Atom | 104 x | 104 y | 104 z | 10 Biso, Å2 |
|  | | | | |
|  |  |  |  |  |
| Ba(1) | 577.6(2) | 1131.9(1) | 7005.7(3) | 13 |
|  |  |  |  |  |
| Ba(2) | 4475.4(2) | 3829.2(1) | 2977.8(3) | 13 |
|  |  |  |  |  |
| O(3) | 1916(3) | 709(2) | 8647(4) | 28 |
|  |  |  |  |  |
| P(4) | 2773(1) | 422(1) | 9288(2) | 21 |
|  |  |  |  |  |
| N(5) | 2670(3) | -57(2) | 10101(5) | 26 |
|  |  |  |  |  |
| C(6) | 1926(5) | -288(3) | 9848(7) | 41 |
|  |  |  |  |  |
| C(7) | 3400(5) | -390(3) | 10884(7) | 38 |
|  |  |  |  |  |
| N(8) | 3208(3) | 899(2) | 10218(5) | 26 |
|  |  |  |  |  |
| C(9) | 4113(5) | 813(3) | 10710(7) | 38 |
|  |  |  |  |  |
| C(10) | 2648(4) | 1442(3) | 10825(7) | 31 |
|  |  |  |  |  |
| N(11) | 3535(3) | 69(2) | 8360(5) | 30 |
|  |  |  |  |  |
| C(12) | 3810(5) | 414(3) | 7603(7) | 40 |
|  |  |  |  |  |
| C(13) | 3476(5) | -479(3) | 7644(7) | 37 |
|  |  |  |  |  |
| O(14) | 120(3) | 1755(2) | 9198(4) | 23 |
|  |  |  |  |  |
| P(15) | -97(1) | 2129(1) | 10399(1) | 19 |
|  |  |  |  |  |
| N(16) | -1140(3) | 2361(2) | 10587(5) | 25 |
|  |  |  |  |  |
| C(17) | -1516(5) | 1963(3) | 11019(8) | 43 |
|  |  |  |  |  |
| C(18) | -1717(5) | 2657(3) | 9548(7) | 35 |
|  |  |  |  |  |
| N(19) | 388(3) | 1784(2) | 11611(5) | 25 |
|  |  |  |  |  |
| C(20) | 402(5) | 2053(3) | 12946(7) | 42 |
|  |  |  |  |  |
| C(21) | 658(5) | 1141(3) | 11445(7) | 38 |
|  |  |  |  |  |
| N(22) | 133(3) | 2746(2) | 10465(5) | 23 |
|  |  |  |  |  |
| C(23) | -168(4) | 3274(2) | 11333(6) | 27 |
|  |  |  |  |  |
| C(24) | 814(4) | 2765(3) | 9754(6) | 29 |
|  |  |  |  |  |
| O(25) | 1403(2) | 1924(2) | 6844(4) | 22 |
|  |  |  |  |  |
| C(26) | 1287(3) | 2378(2) | 6401(5) | 15 |
|  |  |  |  |  |
| C(27) | 457(3) | 2788(2) | 6080(5) | 17 |
|  |  |  |  |  |
| C(28) | -293(3) | 2609(2) | 6046(5) | 15 |
|  |  |  |  |  |
| O(29) | -343(2) | 2111(2) | 6011(4) | 20 |
|  |  |  |  |  |
| O(30) | 1971(2) | 2513(2) | 6124(4) | 20 |
|  |  |  |  |  |
| C(31) | 2792(4) | 2086(3) | 6304(6) | 26 |
|  |  |  |  |  |
| O(32) | -1040(2) | 3050(2) | 6035(4) | 26 |
|  |  |  |  |  |
| C(33) | -1807(4) | 2865(3) | 5880(8) | 36 |
|  |  |  |  |  |
| C(34) | 446(4) | 3359(2) | 5813(5) | 18 |
|  |  |  |  |  |
| O(35) | 912(3) | 3654(2) | 6323(4) | 26 |
|  |  |  |  |  |
| O(36) | -180(3) | 3539(2) | 4823(4) | 24 |
|  |  |  |  |  |
| C(37) | -250(4) | 4111(2) | 4543(6) | 28 |
|  |  |  |  |  |
| O(38) | -1041(2) | 1026(2) | 7174(4) | 22 |
|  |  |  |  |  |
| C(39) | -1455(3) | 683(2) | 6739(5) | 17 |
|  |  |  |  |  |
| C(40) | -1132(3) | 70(2) | 6295(5) | 17 |
|  |  |  |  |  |
| C(41) | -225(3) | -178(2) | 6308(5) | 16 |
|  |  |  |  |  |
| O(42) | 349(2) | 65(2) | 6736(4) | 19 |
|  |  |  |  |  |
| O(43) | -2341(2) | 864(2) | 6551(4) | 22 |
|  |  |  |  |  |
| C(44) | -2714(4) | 1470(3) | 6997(6) | 26 |
|  |  |  |  |  |
| O(45) | 22(2) | -757(1) | 5799(3) | 16 |
|  |  |  |  |  |
| C(46) | 937(3) | -1028(2) | 6014(6) | 19 |
|  |  |  |  |  |
| C(47) | -1709(3) | -301(2) | 5816(5) | 18 |
|  |  |  |  |  |
| O(48) | -1680(3) | -644(2) | 4849(4) | 31 |
|  |  |  |  |  |
| O(49) | -2305(2) | -245(2) | 6605(4) | 21 |
|  |  |  |  |  |
| C(50) | -2889(4) | -597(3) | 6202(6) | 24 |
|  |  |  |  |  |
| O(51) | 2989(2) | 4345(2) | 1732(4) | 24 |
|  |  |  |  |  |
| P(52) | 2376(1) | 4825(1) | 1103(2) | 18 |
|  |  |  |  |  |
| N(53) | 1707(3) | 4586(2) | -22(5) | 23 |
|  |  |  |  |  |
| C(54) | 1255(4) | 4203(3) | 269(7) | 35 |
|  |  |  |  |  |
| C(55) | 1393(4) | 4802(3) | -1247(6) | 33 |
|  |  |  |  |  |
| N(56) | 1776(3) | 5297(2) | 2127(5) | 23 |
|  |  |  |  |  |
| C(57) | 2169(4) | 5481(3) | 3388(7) | 31 |
|  |  |  |  |  |
| C(58) | 893(4) | 5626(3) | 1813(7) | 37 |
|  |  |  |  |  |
| N(59) | 2893(3) | 5169(2) | 451(5) | 24 |
|  |  |  |  |  |
| C(60) | 3679(4) | 4857(3) | -116(7) | 35 |
| C(61) | 2533(5) | 5759(3) | 225(8) | 42 |
|  |  |  |  |  |
| O(62) | 4757(2) | 3317(2) | 655(4) | 20 |
|  |  |  |  |  |
| P(63) | 4627(1) | 2955(1) | -600(1) | 18 |
|  |  |  |  |  |
| N(64) | 5037(3) | 2267(2) | -420(5) | 23 |
|  |  |  |  |  |
| C(65) | 4982(4) | 1794(3) | -1454(6) | 27 |
|  |  |  |  |  |
| C(66) | 5742(4) | 2095(3) | 589(6) | 34 |
|  |  |  |  |  |
| N(67) | 5036(4) | 3158(2) | -1666(5) | 28 |
|  |  |  |  |  |
| C(68) | 5572(5) | 3559(3) | -1309(7) | 35 |
|  |  |  |  |  |
| C(69) | 5011(5) | 2896(3) | -3011(6) | 35 |
|  |  |  |  |  |
| N(70) | 3631(3) | 2974(2) | -1247(5) | 23 |
|  |  |  |  |  |
| C(71) | 3119(4) | 3462(3) | -1940(7) | 37 |
|  |  |  |  |  |
| C(72) | 3108(4) | 2791(3) | -499(7) | 38 |
|  |  |  |  |  |
| O(73) | 5448(2) | 2802(2) | 3808(3) | 17 |
|  |  |  |  |  |
| C(74) | 5364(3) | 2317(2) | 3842(5) | 18 |
|  |  |  |  |  |
| C(75) | 4584(3) | 2163(2) | 3857(5) | 17 |
|  |  |  |  |  |
| C(76) | 3791(3) | 2571(2) | 3449(5) | 17 |
|  |  |  |  |  |
| O(77) | 3702(2) | 2994(2) | 2928(4) | 23 |
|  |  |  |  |  |
| O(78) | 6086(2) | 1850(2) | 3829(4) | 23 |
|  |  |  |  |  |
| C(79) | 6888(4) | 1976(3) | 3893(7) | 31 |
|  |  |  |  |  |
| O(80) | 3077(2) | 2446(2) | 3692(4) | 28 |
|  |  |  |  |  |
| C(81) | 2268(4) | 2844(3) | 3325(7) | 36 |
|  |  |  |  |  |
| C(82) | 4591(4) | 1617(2) | 4251(5) | 19 |
|  |  |  |  |  |
| O(83) | 4089(3) | 1331(2) | 3845(4) | 26 |
|  |  |  |  |  |
| O(84) | 5241(3) | 1438(2) | 5191(4) | 23 |
|  |  |  |  |  |
| C(85) | 5334(4) | 874(3) | 5538(6) | 29 |
|  |  |  |  |  |
| O(86) | 4637(2) | 4947(2) | 3371(4) | 19 |
|  |  |  |  |  |
| C(87) | 5183(4) | 5205(2) | 3721(5) | 17 |
|  |  |  |  |  |
| C(88) | 6100(3) | 4987(2) | 3687(5) | 14 |
|  |  |  |  |  |
| C(89) | 6425(3) | 4380(2) | 3178(5) | 17 |
|  |  |  |  |  |
| O(90) | 5986(2) | 4050(2) | 2666(4) | 20 |
|  |  |  |  |  |
| O(91) | 4918(2) | 5790(2) | 4178(4) | 19 |
|  |  |  |  |  |
| C(92) | 3995(3) | 6039(2) | 4102(6) | 20 |
| O(93) | 7291(2) | 4158(2) | 3397(4) | 23 |
|  |  |  |  |  |
| C(94) | 7624(4) | 3547(3) | 2982(6) | 27 |
|  |  |  |  |  |
| C(95) | 6668(4) | 5353(2) | 4235(5) | 19 |
|  |  |  |  |  |
| O(96) | 6506(2) | 5773(2) | 5059(4) | 23 |
|  |  |  |  |  |
| O(97) | 7425(2) | 5211(2) | 3732(4) | 22 |
|  |  |  |  |  |
| C(98) | 8009(4) | 5547(3) | 4385(6) | 25 |
|  |  |  |  |  |

a Isotropic values for those atoms refined anisotropically are calculated using the formula given by Hamilton: Hamilton, W. C. *Acta Crystallogr.* **1959**, *12*, 609.

**Table S9.** Anisotropic Thermal Parameters for Ba2[C(CO2Me)3]4[HMPA]4

|  | | | | | | |
| --- | --- | --- | --- | --- | --- | --- |
| Atom | U11 | U22 | U33 | U12 | U13 | U23 |
|  | | | | | | |
|  |  |  |  |  |  |  |
| Ba(1) | 17.1(2) | 12.9(2) | 18.2(2) | -3.1(1) | 3.3(1) | 1.8(1) |
|  |  |  |  |  |  |  |
| Ba(2) | 17.7(2) | 12.3(2) | 19.4(2) | -3.2(1) | 1.6(1) | 1.1(1) |
|  |  |  |  |  |  |  |
| O(3) | 31(3) | 28(3) | 42(3) | -6(2) | -6(2) | 8(2) |
|  |  |  |  |  |  |  |
| P(4) | 26(1) | 24(1) | 31(1) | -1(1) | 3(1) | 10(1) |
|  |  |  |  |  |  |  |
| N(5) | 31(3) | 27(3) | 41(4) | 1(3) | 8(3) | 14(3) |
|  |  |  |  |  |  |  |
| C(6) | 62(6) | 37(5) | 58(6) | -13(4) | 9(5) | 13(4) |
|  |  |  |  |  |  |  |
| C(7) | 61(5) | 34(5) | 38(5) | 4(4) | 6(4) | 10(4) |
|  |  |  |  |  |  |  |
| N(8) | 28(3) | 31(3) | 34(4) | -3(3) | -1(3) | 4(3) |
|  |  |  |  |  |  |  |
| C(9) | 42(5) | 60(6) | 43(5) | -16(4) | 9(4) | 1(4) |
|  |  |  |  |  |  |  |
| C(10) | 41(4) | 25(4) | 51(5) | -4(3) | 11(4) | 5(4) |
|  |  |  |  |  |  |  |
| N(11) | 41(4) | 43(4) | 33(4) | -10(3) | 8(3) | 9(3) |
|  |  |  |  |  |  |  |
| C(12) | 58(5) | 63(6) | 41(5) | -29(5) | 16(4) | 0(4) |
|  |  |  |  |  |  |  |
| C(13) | 62(5) | 38(5) | 38(5) | -15(4) | 7(4) | -4(4) |
|  |  |  |  |  |  |  |
| O(14) | 43(3) | 22(2) | 24(3) | -9(2) | 10(2) | -2(2) |
|  |  |  |  |  |  |  |
| P(15) | 34(1) | 18(1) | 21(1) | -8(1) | 7(1) | 0(1) |
|  |  |  |  |  |  |  |
| N(16) | 35(3) | 28(3) | 35(4) | -13(3) | 3(3) | 9(3) |
|  |  |  |  |  |  |  |
| C(17) | 40(5) | 58(6) | 78(7) | -22(4) | 14(4) | 27(5) |
|  |  |  |  |  |  |  |
| C(18) | 49(5) | 34(4) | 46(5) | -10(4) | -7(4) | 10(4) |
|  |  |  |  |  |  |  |
| N(19) | 39(4) | 29(3) | 25(3) | -8(3) | 0(3) | 8(3) |
|  |  |  |  |  |  |  |
| C(20) | 80(6) | 48(5) | 30(5) | -24(5) | 1(4) | 1(4) |
|  |  |  |  |  |  |  |
| C(21) | 53(5) | 38(5) | 52(5) | 2(4) | 18(4) | 14(4) |
|  |  |  |  |  |  |  |
| N(22) | 38(3) | 23(3) | 29(3) | -11(3) | 13(3) | -4(3) |
|  |  |  |  |  |  |  |
| C(23) | 36(4) | 17(4) | 47(5) | -4(3) | 9(4) | -3(3) |
|  |  |  |  |  |  |  |
| C(24) | 45(5) | 35(4) | 38(4) | -19(4) | 11(4) | 3(3) |
|  |  |  |  |  |  |  |
| O(25) | 20(2) | 26(3) | 39(3) | -9(2) | -3(2) | 12(2) |
|  |  |  |  |  |  |  |
| C(26) | 22(3) | 17(3) | 20(3) | -7(3) | 3(3) | 3(3) |
|  |  |  |  |  |  |  |
| C(27) | 23(3) | 17(3) | 25(4) | -8(3) | 3(3) | -1(3) |
|  |  |  |  |  |  |  |
| C(28) | 20(3) | 19(4) | 16(3) | -1(3) | -1(3) | 8(3) |
|  |  |  |  |  |  |  |
| O(29) | 24(2) | 21(3) | 35(3) | -11(2) | -3(2) | 9(2) |
|  |  |  |  |  |  |  |
| O(30) | 18(2) | 22(2) | 38(3) | -4(2) | 8(2) | 11(2) |
|  |  |  |  |  |  |  |
| C(31) | 23(4) | 25(4) | 47(5) | -5(3) | 4(3) | 4(3) |
|  |  |  |  |  |  |  |
| O(32) | 20(3) | 16(2) | 62(3) | -5(2) | 3(2) | 7(2) |
|  |  |  |  |  |  |  |
| C(33) | 14(4) | 36(4) | 85(6) | -6(3) | 1(4) | 10(4) |
|  |  |  |  |  |  |  |
| C(34) | 26(4) | 17(3) | 26(4) | -7(3) | 8(3) | -2(3) |
|  |  |  |  |  |  |  |
| O(35) | 31(3) | 20(2) | 52(3) | -15(2) | -3(2) | 5(2) |
|  |  |  |  |  |  |  |
| O(36) | 41(3) | 18(2) | 33(3) | -14(2) | -4(2) | 8(2) |
|  |  |  |  |  |  |  |
| C(37) | 46(5) | 18(4) | 44(5) | -5(3) | 6(4) | 13(3) |
|  |  |  |  |  |  |  |
| O(38) | 26(3) | 25(3) | 34(3) | -12(2) | 7(2) | -1(2) |
|  |  |  |  |  |  |  |
| C(39) | 23(4) | 29(4) | 14(3) | -4(3) | 7(3) | 9(3) |
|  |  |  |  |  |  |  |
| C(40) | 23(4) | 20(3) | 24(4) | -8(3) | 6(3) | -1(3) |
|  |  |  |  |  |  |  |
| C(41) | 23(4) | 18(3) | 20(3) | -4(3) | 5(3) | 4(3) |
|  |  |  |  |  |  |  |
| O(42) | 22(2) | 16(2) | 35(3) | -6(2) | 4(2) | 3(2) |
|  |  |  |  |  |  |  |
| O(43) | 17(2) | 20(2) | 43(3) | -2(2) | 7(2) | 1(2) |
|  |  |  |  |  |  |  |
| C(44) | 25(4) | 23(4) | 44(5) | -3(3) | 3(3) | -3(3) |
|  |  |  |  |  |  |  |
| O(45) | 18(2) | 13(2) | 26(2) | 1(2) | 4(2) | 3(2) |
|  |  |  |  |  |  |  |
| C(46) | 22(3) | 14(3) | 34(4) | 1(3) | 2(3) | 7(3) |
|  |  |  |  |  |  |  |
| C(47) | 20(3) | 22(4) | 23(4) | 3(3) | 9(3) | 6(3) |
|  |  |  |  |  |  |  |
| O(48) | 30(3) | 51(3) | 36(3) | -21(2) | 13(2) | -19(3) |
|  |  |  |  |  |  |  |
| O(49) | 26(2) | 22(2) | 33(3) | -11(2) | 8(2) | -1(2) |
|  |  |  |  |  |  |  |
| C(50) | 29(4) | 31(4) | 38(4) | -14(3) | 5(3) | 7(3) |
|  |  |  |  |  |  |  |
| O(51) | 23(2) | 24(2) | 42(3) | 0(2) | 4(2) | 12(2) |
|  |  |  |  |  |  |  |
| P(52) | 19(1) | 18(1) | 31(1) | -3(1) | 1(1) | 5(1) |
|  |  |  |  |  |  |  |
| N(53) | 28(3) | 21(3) | 37(3) | -6(2) | -1(2) | 3(2) |
|  |  |  |  |  |  |  |
| C(54) | 35(4) | 44(4) | 58(5) | -18(3) | -6(3) | 13(4) |
|  |  |  |  |  |  |  |
| C(55) | 37(4) | 45(4) | 34(4) | -3(3) | -1(3) | 1(3) |
|  |  |  |  |  |  |  |
| N(56) | 24(3) | 28(3) | 29(3) | -2(2) | -4(2) | 0(2) |
|  |  |  |  |  |  |  |
| C(57) | 33(4) | 33(4) | 44(4) | -5(3) | 0(3) | 1(3) |
|  |  |  |  |  |  |  |
| C(58) | 37(4) | 49(4) | 40(4) | 1(3) | -1(3) | -3(3) |
|  |  |  |  |  |  |  |
| N(59) | 27(3) | 22(3) | 40(3) | -2(2) | 3(2) | 11(2) |
|  |  |  |  |  |  |  |
| C(60) | 36(4) | 48(4) | 52(5) | -12(3) | 14(3) | 6(4) |
| C(61) | 43(4) | 41(4) | 79(6) | -13(4) | -3(4) | 25(4) |
|  |  |  |  |  |  |  |
| O(62) | 28(2) | 22(2) | 22(2) | -4(2) | 4(2) | 1(2) |
|  |  |  |  |  |  |  |
| P(63) | 27(1) | 19(1) | 21(1) | -6(1) | 4(1) | 1(1) |
|  |  |  |  |  |  |  |
| N(64) | 40(3) | 19(3) | 25(3) | -2(2) | -3(2) | 6(2) |
|  |  |  |  |  |  |  |
| C(65) | 39(4) | 24(3) | 31(4) | -1(3) | -5(3) | 2(3) |
|  |  |  |  |  |  |  |
| C(66) | 46(4) | 36(4) | 33(4) | 0(3) | -7(3) | 2(3) |
|  |  |  |  |  |  |  |
| N(67) | 52(4) | 37(3) | 26(3) | -26(3) | 3(3) | 1(2) |
|  |  |  |  |  |  |  |
| C(68) | 48(4) | 53(5) | 45(4) | -30(4) | 9(3) | 6(4) |
|  |  |  |  |  |  |  |
| C(69) | 72(5) | 37(4) | 33(4) | -25(4) | 16(4) | 2(3) |
|  |  |  |  |  |  |  |
| N(70) | 29(3) | 24(3) | 29(3) | 1(2) | 6(2) | 3(2) |
|  |  |  |  |  |  |  |
| C(71) | 43(4) | 33(4) | 50(5) | 0(3) | -10(3) | 4(3) |
|  |  |  |  |  |  |  |
| C(72) | 39(4) | 68(5) | 45(4) | -26(4) | 12(3) | -3(4) |
|  |  |  |  |  |  |  |
| O(73) | 23(2) | 18(2) | 25(2) | -11(2) | -4(2) | 5(2) |
|  |  |  |  |  |  |  |
| C(74) | 24(3) | 20(3) | 22(3) | -5(3) | 1(2) | -3(2) |
|  |  |  |  |  |  |  |
| C(75) | 24(3) | 23(3) | 18(3) | -5(3) | 1(2) | 3(2) |
|  |  |  |  |  |  |  |
| C(76) | 18(3) | 25(3) | 21(3) | -10(3) | -3(2) | -4(3) |
|  |  |  |  |  |  |  |
| O(77) | 23(2) | 25(2) | 38(3) | -7(2) | -4(2) | 13(2) |
|  |  |  |  |  |  |  |
| O(78) | 18(2) | 20(2) | 52(3) | -6(2) | 2(2) | 9(2) |
|  |  |  |  |  |  |  |
| C(79) | 25(4) | 33(4) | 61(5) | -4(3) | 3(3) | 19(3) |
|  |  |  |  |  |  |  |
| O(80) | 20(2) | 37(3) | 52(3) | -6(2) | 0(2) | 24(2) |
|  |  |  |  |  |  |  |
| C(81) | 17(3) | 57(5) | 64(5) | -5(3) | 0(3) | 28(4) |
|  |  |  |  |  |  |  |
| C(82) | 26(3) | 25(3) | 20(3) | -5(3) | 5(3) | 1(3) |
|  |  |  |  |  |  |  |
| O(83) | 37(3) | 22(2) | 44(3) | -17(2) | -3(2) | 6(2) |
|  |  |  |  |  |  |  |
| O(84) | 39(3) | 20(2) | 31(2) | -13(2) | -5(2) | 10(2) |
|  |  |  |  |  |  |  |
| C(85) | 60(5) | 21(3) | 33(4) | -11(3) | 5(3) | 9(3) |
|  |  |  |  |  |  |  |
| O(86) | 24(2) | 17(2) | 34(2) | -9(2) | 2(2) | 1(2) |
|  |  |  |  |  |  |  |
| C(87) | 29(3) | 17(3) | 17(3) | -6(3) | 3(3) | 2(2) |
|  |  |  |  |  |  |  |
| C(88) | 21(3) | 16(3) | 20(3) | -8(2) | 4(2) | 1(2) |
|  |  |  |  |  |  |  |
| C(89) | 23(3) | 24(3) | 20(3) | -9(3) | 4(2) | 3(3) |
|  |  |  |  |  |  |  |
| O(90) | 22(2) | 20(2) | 33(2) | -4(2) | 5(2) | 0(2) |
|  |  |  |  |  |  |  |
| O(91) | 20(2) | 18(2) | 34(2) | -5(2) | 2(2) | 3(2) |
|  |  |  |  |  |  |  |
| C(92) | 21(3) | 19(3) | 34(4) | -3(2) | 7(3) | 5(3) |
| O(93) | 21(2) | 18(2) | 45(3) | -1(2) | 7(2) | 3(2) |
|  |  |  |  |  |  |  |
| C(94) | 36(4) | 23(3) | 41(4) | -3(3) | 6(3) | 6(3) |
|  |  |  |  |  |  |  |
| C(95) | 23(3) | 28(3) | 22(3) | -7(3) | 1(3) | 5(3) |
|  |  |  |  |  |  |  |
| O(96) | 28(2) | 31(2) | 27(2) | -12(2) | 8(2) | -8(2) |
|  |  |  |  |  |  |  |
| O(97) | 25(2) | 28(2) | 34(2) | -10(2) | 10(2) | -1(2) |
|  |  |  |  |  |  |  |
| C(98) | 23(3) | 29(3) | 45(4) | -13(3) | 6(3) | 1(3) |
|  |  |  |  |  |  |  |

Form of the anisotropic thermal parameter: exp[-22(h2a*2U11 + ... + hka*b*U12 + ... )] where a*, b*, and c* are reciprocal lattice constants. All values are  103.

**Table S10.** Bond Lengths and Angles for Ba2[C(CO2Me)3]4[HMPA]4a

|  | | | | | | | | |
| --- | --- | --- | --- | --- | --- | --- | --- | --- |
| Bond Lengths (Å) | | | | | | | | |
|  | | | | | | | | |
| Ba(1)-O(3) | 2.630(4) | | P(63)-O(62) | | 1.489(4) | O(80)-C(76) | | 1.365(7) |
|  |  | |  | |  |  | |  |
| Ba(1)-O(14) | 2.642(4) | | P(63)-N(64) | | 1.638(5) | O(80)-C(81) | | 1.425(7) |
|  |  | |  | |  |  | |  |
| Ba(1)-O(25) | 2.703(4) | | P(63)-N(67) | | 1.624(5) | O(83)-C(82) | | 1.209(7) |
|  |  | |  | |  |  | |  |
| Ba(1)-O(29) | 2.698(4) | | P(63)-N(70) | | 1.648(5) | O(84)-C(82) | | 1.359(7) |
|  |  | |  | |  |  | |  |
| Ba(1)-O(38) | 2.770(4) | | O(25)-C(26) | | 1.231(6) | O(84)-C(85) | | 1.442(7) |
|  |  | |  | |  |  | |  |
| Ba(1)-O(42) | 2.690(4) | | O(29)-C(28) | | 1.232(6) | O(86)-C(87) | | 1.212(6) |
|  |  | |  | |  |  | |  |
| Ba(1)-O(48)' | 2.766(4) | | O(30)-C(26) | | 1.345(6) | O(90)-C(89) | | 1.231(6) |
|  |  | |  | |  |  | |  |
| Ba(2)-O(51) | 2.630(4) | | O(30)-C(31) | | 1.436(7) | O(91)-C(87) | | 1.380(6) |
|  |  | |  | |  |  | |  |
| Ba(2)-O(62) | 2.618(4) | | O(32)-C(28) | | 1.362(6) | O(91)-C(92) | | 1.440(6) |
|  |  | |  | |  |  | |  |
| Ba(2)-O(73) | 2.737(4) | | O(32)-C(33) | | 1.427(7) | O(93)-C(89) | | 1.350(6) |
|  |  | |  | |  |  | |  |
| Ba(2)-O(77) | 2.684(4) | | O(35)-C(34) | | 1.200(6) | O(93)-C(94) | | 1.436(7) |
|  |  | |  | |  |  | |  |
| Ba(2)-O(86) | 2.762(4) | | O(36)-C(34) | | 1.375(7) | O(96)-C(95) | | 1.219(6) |
|  |  | |  | |  |  | |  |
| Ba(2)-O(90) | 2.760(4) | | O(36)-C(37) | | 1.441(7) | O(97)-C(95) | | 1.354(7) |
|  |  | |  | |  |  | |  |
| Ba(2)-O(96)' | 2.715(4) | | O(38)-C(39) | | 1.209(6) | O(97)-C(98) | | 1.451(7) |
|  |  | |  | |  |  | |  |
| P(4)-O(3) | 1.475(4) | | O(42)-C(41) | | 1.237(6) | C(26)-C(27) | | 1.451(8) |
|  |  | |  | |  |  | |  |
| P(4)-N(5) | 1.634(5) | | O(43)-C(39) | | 1.371(6) | C(27)-C(28) | | 1.410(8) |
|  |  | |  | |  |  | |  |
| P(4)-N(8) | 1.638(5) | | O(43)-C(44) | | 1.442(7) | C(27)-C(34) | | 1.460(8) |
|  |  | |  | |  |  | |  |
| P(4)-N(11) | 1.655(5) | | O(45)-C(41) | | 1.379(6) | C(39)-C(40) | | 1.444(8) |
|  |  | |  | |  |  | |  |
| P(15)-O(14) | 1.465(4) | | O(45)-C(46) | | 1.439(6) | C(40)-C(41) | | 1.421(8) |
|  |  | |  | |  |  | |  |
| P(15)-N(16) | 1.659(5) | | O(48)-C(47) | | 1.205(6) | C(40)-C(47) | | 1.465(8) |
|  |  | |  | |  |  | |  |
| P(15)-N(19) | 1.629(5) | | O(49)-C(47) | | 1.352(6) | C(74)-C(75) | | 1.434(8) |
|  |  | |  | |  |  | |  |
| P(15)-N(22) | 1.638(5) | | O(49)-C(50) | | 1.430(7) | C(75)-C(76) | | 1.430(8) |
|  |  | |  | |  |  | |  |
| P(52)-O(51) | 1.473(4) | | O(73)-C(74) | | 1.235(6) | C(75)-C(82) | | 1.459(8) |
|  |  | |  | |  |  | |  |
| P(52)-N(53) | 1.634(5) | | O(77)-C(76) | | 1.215(6) | C(87)-C(88) | | 1.436(8) |
|  |  | |  | |  |  | |  |
| P(52)-N(56) | 1.647(5) | | O(78)-C(74) | | 1.369(6) | C(88)-C(89) | | 1.448(7) |
|  |  | |  | |  |  | |  |
| P(52)-N(59) | 1.651(5) | | O(78)-C(79) | | 1.420(7) | C(88)-C(95) | | 1.456(8) |
|  | | | | | | | | |
| Angles (deg) | | | | | | | | |
|  | | | | | | | | |
| O(3)-Ba(1)-O(14) | | 77.93(13) | | Ba(2)-O(77)-C(76) | | | 139.8(3) | |
|  | |  | |  | | |  | |
| O(3)-Ba(1)-O(25) | | 85.65(12) | | C(74)-O(78)-C(79) | | | 116.3(4) | |
| O(3)-Ba(1)-O(29) | | 143.19(12) | | C(76)-O(80)-C(81) | | | 115.6(5) | |
|  | |  | |  | | |  | |
| O(3)-Ba(1)-O(38) | | 120.74(13) | | C(82)-O(84)-C(85) | | | 116.0(4) | |
|  | |  | |  | | |  | |
| O(3)-Ba(1)-O(42) | | 84.00(12) | | Ba(2)-O(86)-C(87) | | | 140.1(3) | |
|  | |  | |  | | |  | |
| O(3)-Ba(1)-O(48)' | | 85.65(13) | | Ba(2)-O(90)-C(89) | | | 138.3(3) | |
|  | |  | |  | | |  | |
| O(14)-Ba(1)-O(25) | | 86.91(12) | | C(87)-O(91)-C(92) | | | 115.0(4) | |
|  | |  | |  | | |  | |
| O(14)-Ba(1)-O(29) | | 83.70(12) | | C(89)-O(93)-C(94) | | | 116.1(4) | |
|  | |  | |  | | |  | |
| O(14)-Ba(1)-O(38) | | 74.30(12) | | Ba(2)'-O(96)-C(95) | | | 138.7(4) | |
|  | |  | |  | | |  | |
| O(14)-Ba(1)-O(42) | | 111.90(12) | | C(95)-O(97)-C(98) | | | 113.6(4) | |
|  | |  | |  | | |  | |
| O(14)-Ba(1)-O(48)' | | 154.97(12) | | O(25)-C(26)-O(30) | | | 119.2(5) | |
|  | |  | |  | | |  | |
| O(25)-Ba(1)-O(29) | | 61.56(11) | | O(25)-C(26)-C(27) | | | 126.0(5) | |
|  | |  | |  | | |  | |
| O(25)-Ba(1)-O(38) | | 142.09(11) | | O(30)-C(26)-C(27) | | | 114.7(4) | |
|  | |  | |  | | |  | |
| O(25)-Ba(1)-O(42) | | 155.97(11) | | C(26)-C(27)-C(28) | | | 117.6(5) | |
|  | |  | |  | | |  | |
| O(25)-Ba(1)-O(48)' | | 72.99(12) | | C(26)-C(27)-C(34) | | | 118.4(5) | |
|  | |  | |  | | |  | |
| O(29)-Ba(1)-O(38) | | 83.51(11) | | C(28)-C(27)-C(34) | | | 124.0(5) | |
|  | |  | |  | | |  | |
| O(29)-Ba(1)-O(42) | | 132.68(11) | | O(29)-C(28)-O(32) | | | 117.9(5) | |
|  | |  | |  | | |  | |
| O(29)-Ba(1)-O(48)' | | 99.00(13) | | O(29)-C(28)-C(27) | | | 127.9(5) | |
|  | |  | |  | | |  | |
| O(38)-Ba(1)-O(42) | | 60.75(11) | | O(32)-C(28)-C(27) | | | 114.2(5) | |
|  | |  | |  | | |  | |
| O(38)-Ba(1)-O(48)' | | 130.69(11) | | O(35)-C(34)-O(36) | | | 120.4(5) | |
|  | |  | |  | | |  | |
| O(42)-Ba(1)-O(48)' | | 84.63(12) | | O(35)-C(34)-C(27) | | | 128.1(5) | |
|  | |  | |  | | |  | |
| O(51)-Ba(2)-O(62) | | 81.21(12) | | O(36)-C(34)-C(27) | | | 111.5(5) | |
|  | |  | |  | | |  | |
| O(51)-Ba(2)-O(73) | | 144.03(11) | | O(38)-C(39)-O(43) | | | 120.7(5) | |
|  | |  | |  | | |  | |
| O(51)-Ba(2)-O(77) | | 83.36(12) | | O(38)-C(39)-C(40) | | | 127.9(5) | |
|  | |  | |  | | |  | |
| O(51)-Ba(2)-O(86) | | 81.18(12) | | O(43)-C(39)-C(40) | | | 111.3(5) | |
|  | |  | |  | | |  | |
| O(51)-Ba(2)-O(90) | | 120.79(12) | | C(39)-C(40)-C(41) | | | 118.7(5) | |
|  | |  | |  | | |  | |
| O(51)-Ba(2)-O(96)' | | 79.83(12) | | C(39)-C(40)-C(47) | | | 122.3(5) | |
|  | |  | |  | | |  | |
| O(62)-Ba(2)-O(73) | | 86.86(11) | | C(41)-C(40)-C(47) | | | 119.0(5) | |
|  | |  | |  | | |  | |
| O(62)-Ba(2)-O(77) | | 83.11(12) | | O(42)-C(41)-O(45) | | | 117.9(5) | |
|  | |  | |  | | |  | |
| O(62)-Ba(2)-O(86) | | 111.57(12) | | O(42)-C(41)-C(40) | | | 127.3(5) | |
|  | |  | |  | | |  | |
| O(62)-Ba(2)-O(90) | | 76.72(11) | | O(45)-C(41)-C(40) | | | 114.7(5) | |
|  | |  | |  | | |  | |
| O(62)-Ba(2)-O(96)' | | 153.23(12) | | O(48)-C(47)-O(49) | | | 119.8(5) | |
|  | |  | |  | | |  | |
| O(73)-Ba(2)-O(77) | | 61.49(11) | | O(48)-C(47)-C(40) | | | 126.9(5) | |
|  | |  | |  | | |  | |
| O(73)-Ba(2)-O(86) | | 134.56(11) | | O(49)-C(47)-C(40) | | | 113.3(5) | |
| O(73)-Ba(2)-O(90) | | 88.68(11) | | O(73)-C(74)-O(78) | | | 118.4(5) | |
|  | |  | |  | | |  | |
| O(73)-Ba(2)-O(96)' | | 97.57(12) | | O(73)-C(74)-C(75) | | | 128.2(5) | |
|  | |  | |  | | |  | |
| O(77)-Ba(2)-O(86) | | 156.60(11) | | O(78)-C(74)-C(75) | | | 113.4(5) | |
|  | |  | |  | | |  | |
| O(77)-Ba(2)-O(90) | | 144.86(11) | | C(74)-C(75)-C(76) | | | 116.5(5) | |
|  | |  | |  | | |  | |
| O(77)-Ba(2)-O(96)' | | 76.07(12) | | C(74)-C(75)-C(82) | | | 122.3(5) | |
|  | |  | |  | | |  | |
| O(86)-Ba(2)-O(90) | | 58.47(11) | | C(76)-C(75)-C(82) | | | 121.2(5) | |
|  | |  | |  | | |  | |
| O(86)-Ba(2)-O(96)' | | 83.96(11) | | O(77)-C(76)-O(80) | | | 119.4(5) | |
|  | |  | |  | | |  | |
| O(90)-Ba(2)-O(96)' | | 129.56(11) | | O(77)-C(76)-C(75) | | | 127.4(5) | |
|  | |  | |  | | |  | |
| Ba(1)-O(3)-P(4) | | 166.17(27) | | O(80)-C(76)-C(75) | | | 113.1(5) | |
|  | |  | |  | | |  | |
| Ba(1)-O(14)-P(15) | | 175.79(24) | | O(83)-C(82)-O(84) | | | 119.5(5) | |
|  | |  | |  | | |  | |
| Ba(1)-O(25)-C(26) | | 141.2(3) | | O(83)-C(82)-C(75) | | | 127.2(5) | |
|  | |  | |  | | |  | |
| Ba(1)-O(29)-C(28) | | 138.1(3) | | O(84)-C(82)-C(75) | | | 113.3(5) | |
|  | |  | |  | | |  | |
| C(26)-O(30)-C(31) | | 116.0(4) | | O(86)-C(87)-O(91) | | | 118.3(5) | |
|  | |  | |  | | |  | |
| C(28)-O(32)-C(33) | | 114.4(4) | | O(86)-C(87)-C(88) | | | 128.3(5) | |
|  | |  | |  | | |  | |
| C(34)-O(36)-C(37) | | 114.4(4) | | O(91)-C(87)-C(88) | | | 113.3(4) | |
|  | |  | |  | | |  | |
| Ba(1)-O(38)-C(39) | | 137.0(3) | | C(87)-C(88)-C(89) | | | 116.5(5) | |
|  | |  | |  | | |  | |
| Ba(1)-O(42)-C(41) | | 138.5(3) | | C(87)-C(88)-C(95) | | | 120.7(5) | |
|  | |  | |  | | |  | |
| C(39)-O(43)-C(44) | | 114.6(4) | | C(89)-C(88)-C(95) | | | 122.6(5) | |
|  | |  | |  | | |  | |
| C(41)-O(45)-C(46) | | 114.1(4) | | O(90)-C(89)-O(93) | | | 118.5(5) | |
|  | |  | |  | | |  | |
| Ba(1)'-O(48)-C(47) | | 137.8(4) | | O(90)-C(89)-C(88) | | | 126.3(5) | |
|  | |  | |  | | |  | |
| C(47)-O(49)-C(50) | | 116.5(4) | | O(93)-C(89)-C(88) | | | 115.0(5) | |
|  | |  | |  | | |  | |
| Ba(2)-O(51)-P(52) | | 154.24(24) | | O(96)-C(95)-O(97) | | | 119.1(5) | |
|  | |  | |  | | |  | |
| Ba(2)-O(62)-P(63) | | 157.95(23) | | O(96)-C(95)-C(88) | | | 125.7(5) | |
|  | |  | |  | | |  | |
| Ba(2)-O(73)-C(74) | | 138.2(3) | | O(97)-C(95)-C(88) | | | 115.2(5) | |
|  | |  | |  | | |  | |

a Numbers in parentheses are estimated standard deviations in the least significant digits.
